# Supplementary material for: Alkyl-functionalization of 3,5-bis(2-pyridyl)-1,2,4,6-thiatriazine
Source: Royal Society of Chemistry journal article supplement (doi:10.1039/c5nj02611c), 2016-01-01
Supplement: c5nj02611c1.pdf [file c5nj02611c1.pdf]

Electronic Supporting Information

# Alkyl-functionalization of 3,5-*bis*(2-pyridyl)-1,2,4,6-thiatriazine

*Elizabeth Kleisath, <sup>a,b</sup> Nathan J. Yutronkie, <sup>a,b</sup> Ilia Korobkov, <sup>a</sup> Bulat M. Gabidullin <sup>a</sup> and Jaclyn L. Brusso <sup>\*a,b</sup>*

<sup>a</sup>Department of Chemistry and Biomolecular Science and <sup>b</sup>Centre for Catalysis Research and Innovation, University of Ottawa, Ottawa, Ontario K1N 6N5, Canada.

**Contents (23 pages)**

|                 |                                         |
|-----------------|-----------------------------------------|
| <b>Page S2</b>  | <b>NMR Spectra</b>                      |
| <b>Page S15</b> | <b>Crystallography</b>                  |
| <b>Page S18</b> | <b>UV-Vis and Computational Studies</b> |
| <b>Page S23</b> | <b>References</b>                       |

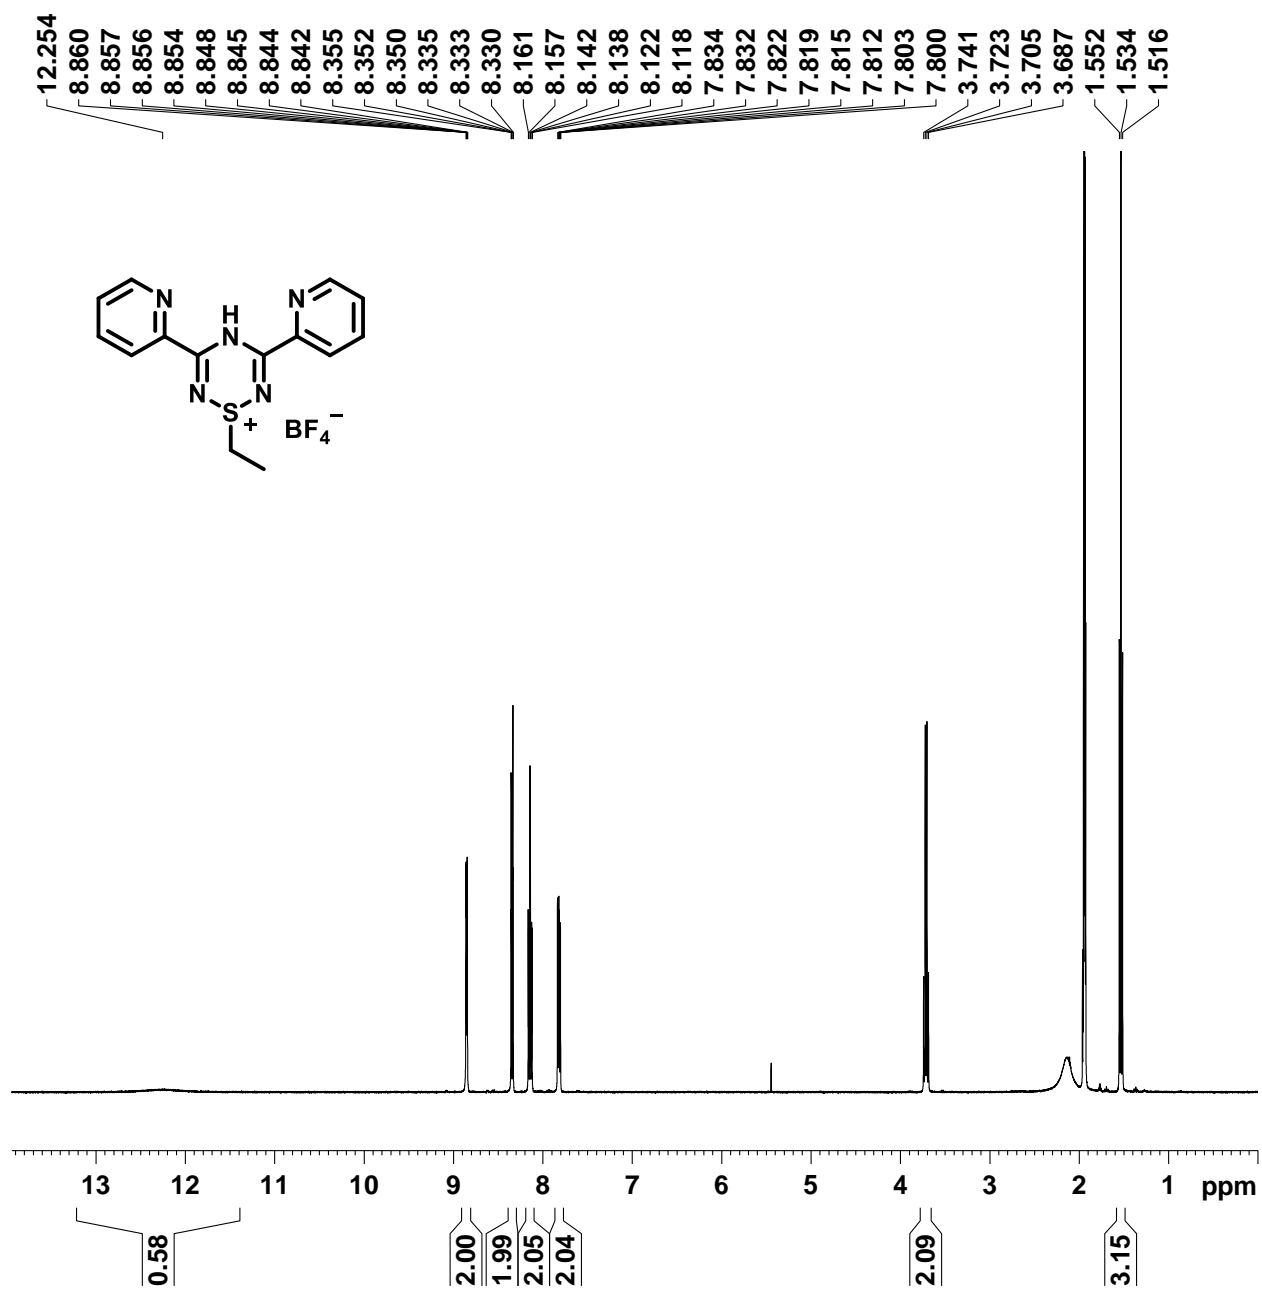

**Figure S1.**  $^1\text{H}$  NMR spectrum of **12** in  $\text{MeCN-d}_3$ .

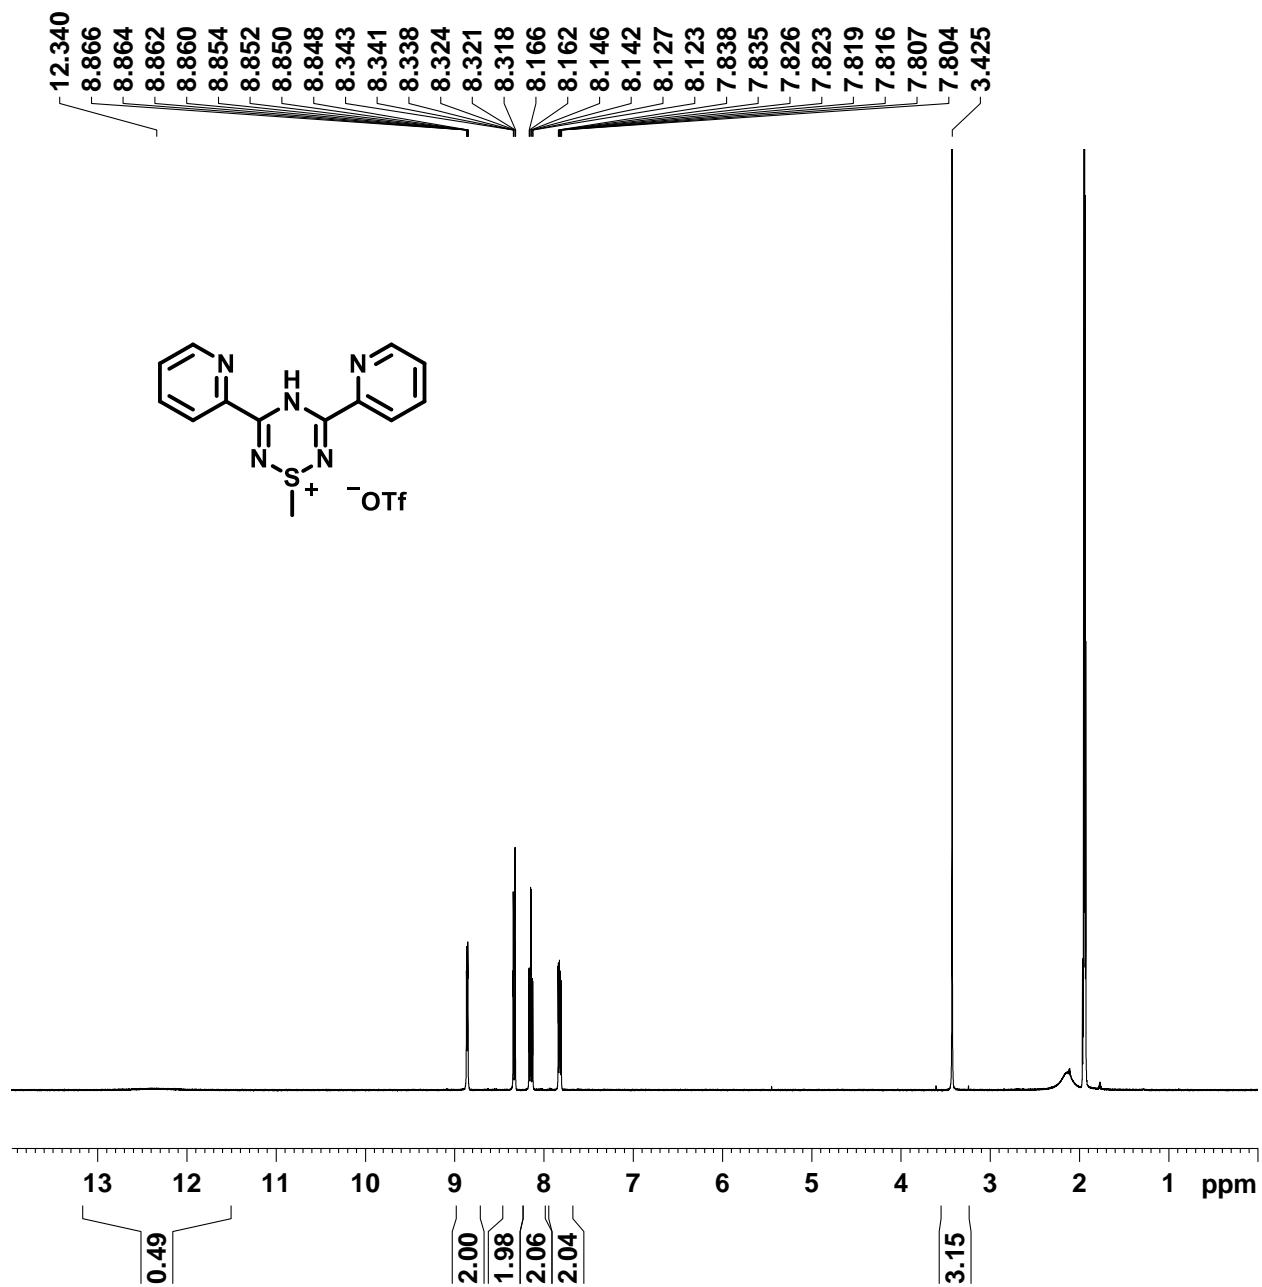

Figure S2. <sup>1</sup>H NMR spectrum of **13** in MeCN-d<sub>3</sub>.

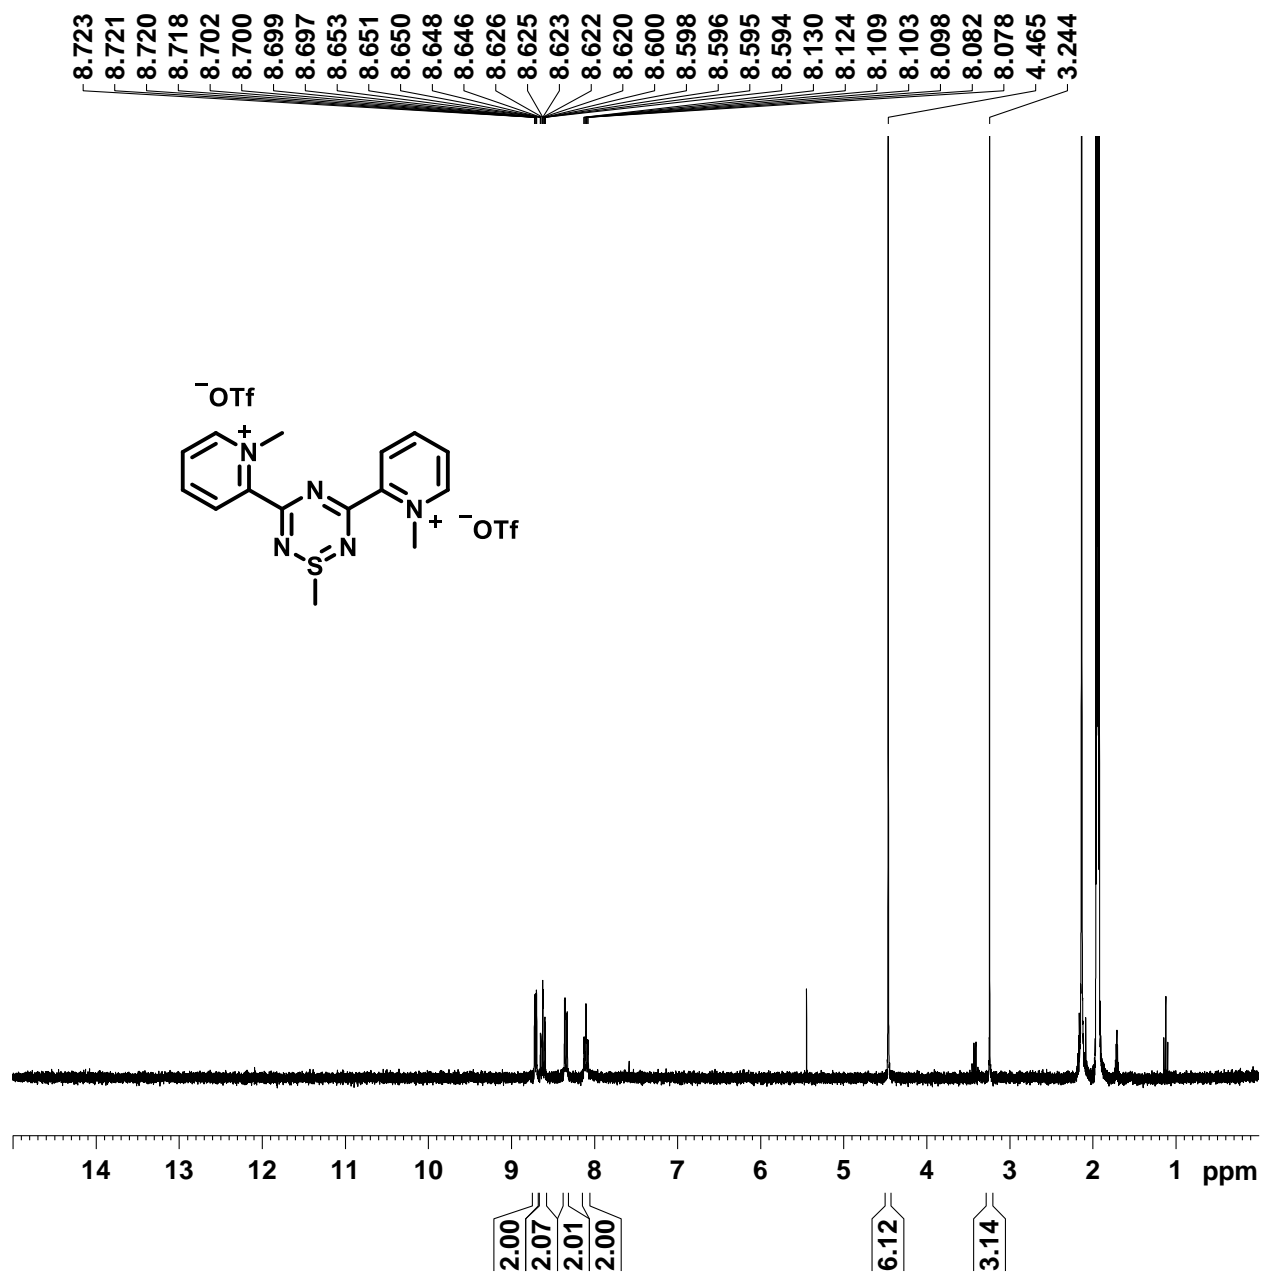

Figure S3. <sup>1</sup>H NMR spectrum of [3,5-*bis*(*N*-methyl-2-pyridinium)-*S*-methyl-1,2,4,6-thiazine][OTf]<sub>2</sub> in MeCN-d<sub>3</sub>.

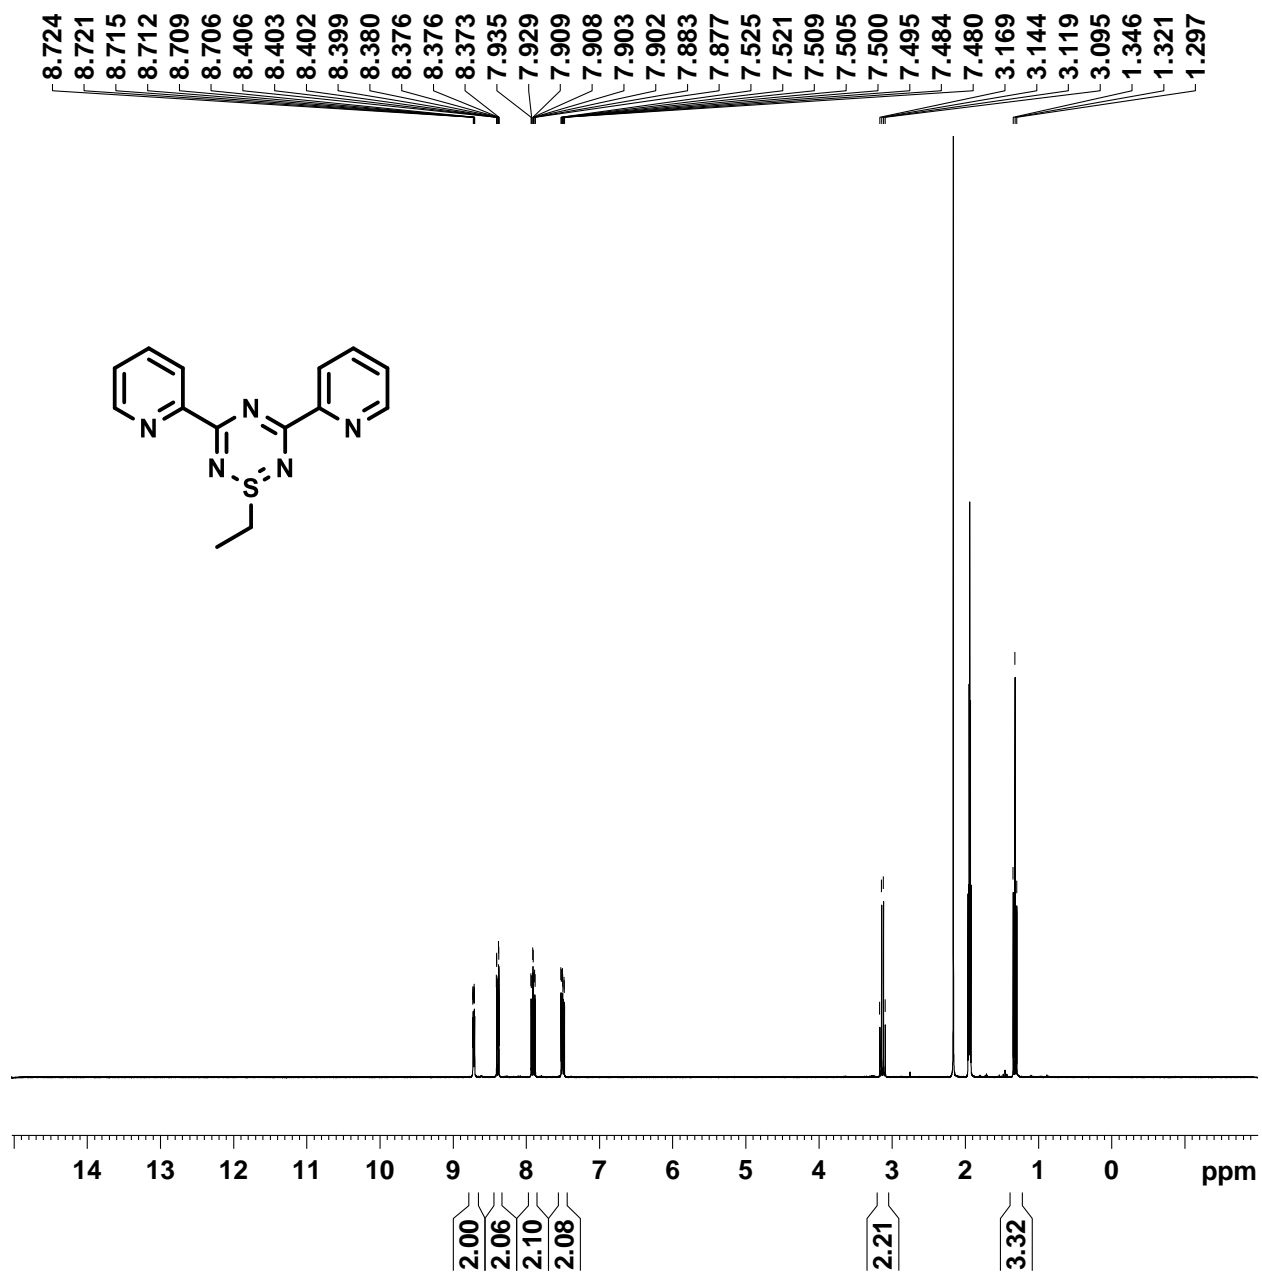

**Figure S4.** <sup>1</sup>H NMR spectrum of **14** in MeCN-d<sub>3</sub>.

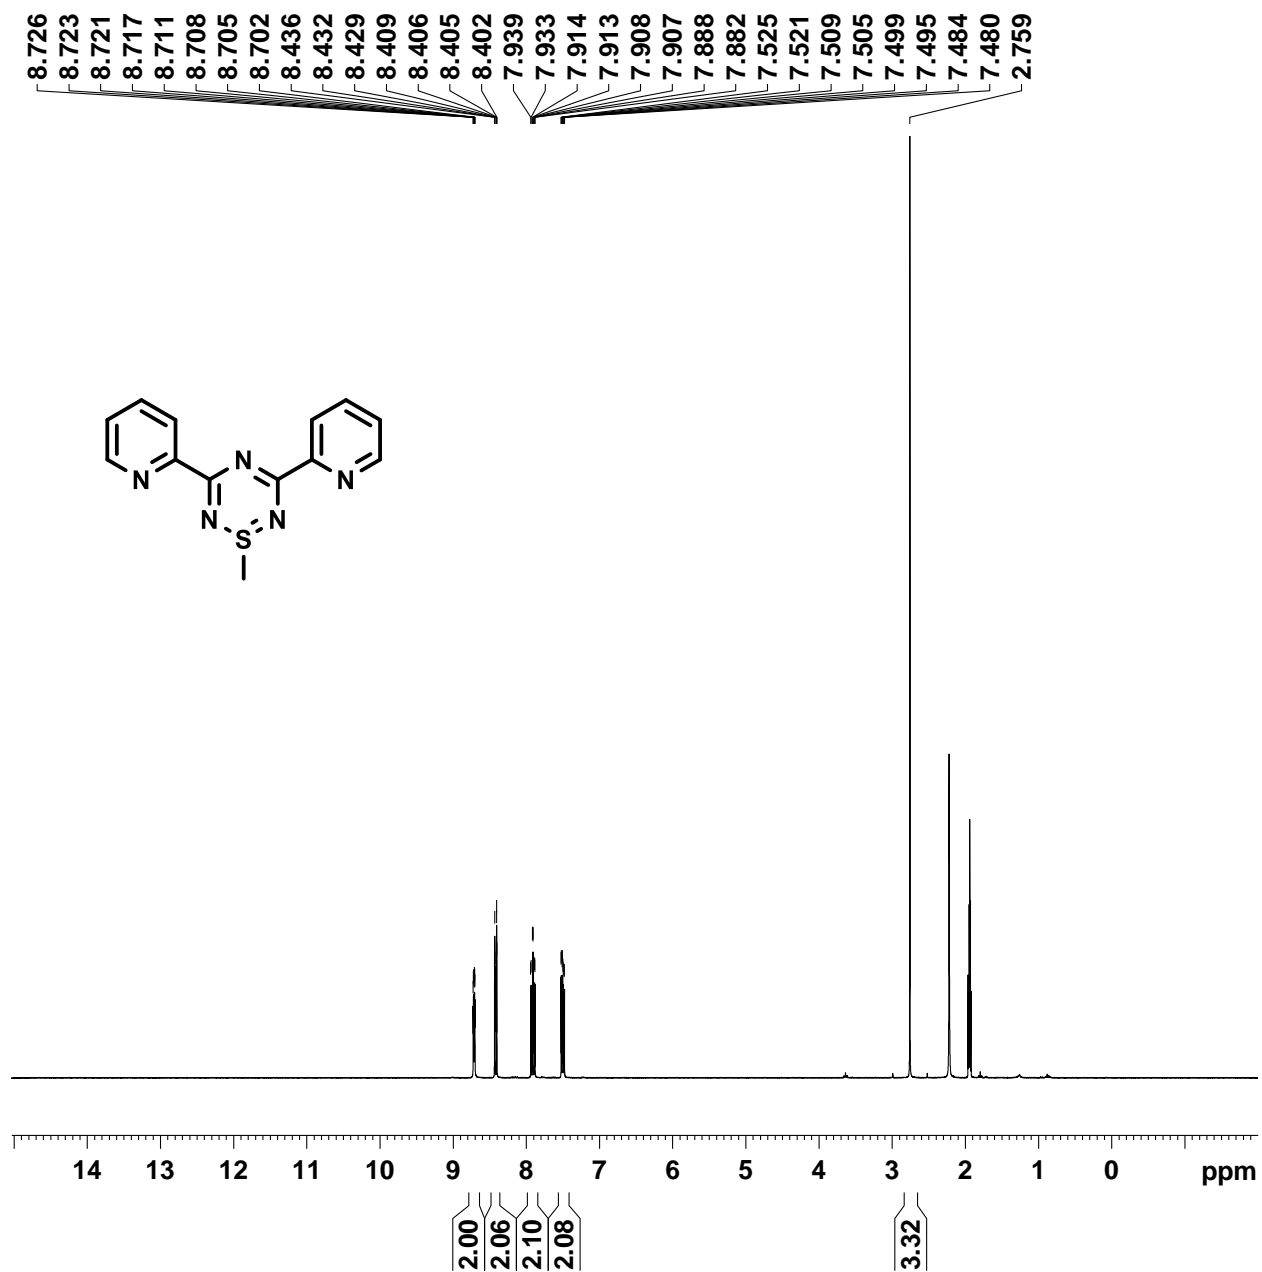

**Figure S5.** <sup>1</sup>H NMR spectrum of **15** in MeCN-d<sub>3</sub>.

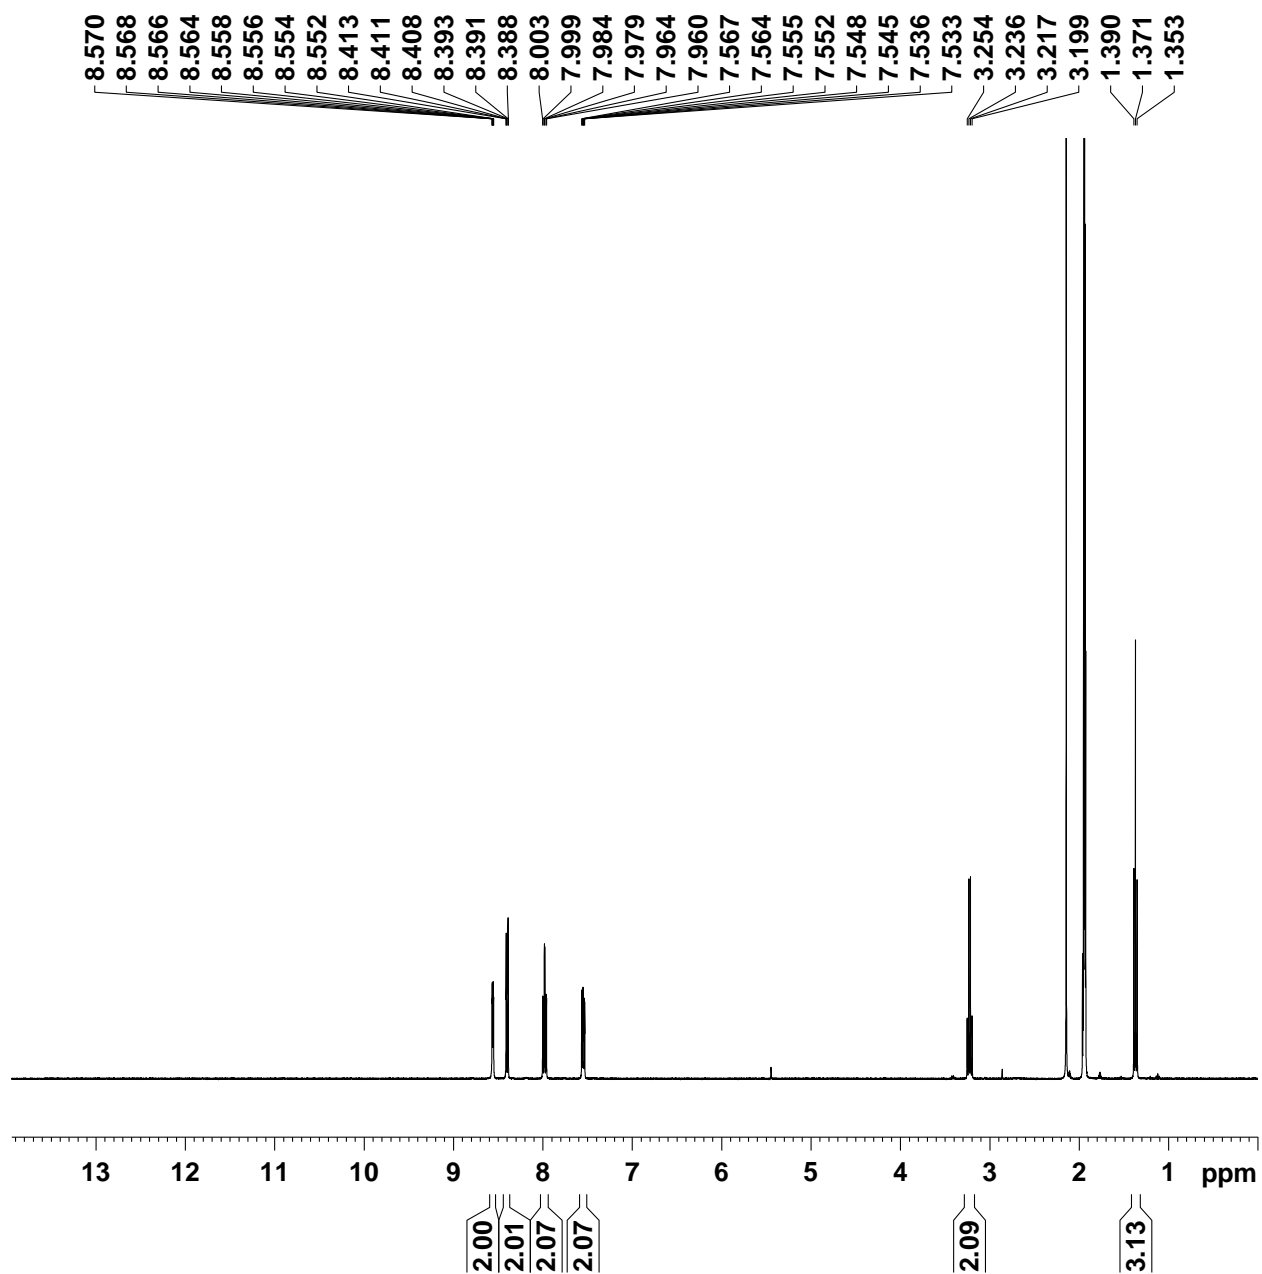

**Figure S6.**  $^1\text{H}$  NMR spectrum of **17** in  $\text{MeCN-d}_3$ .

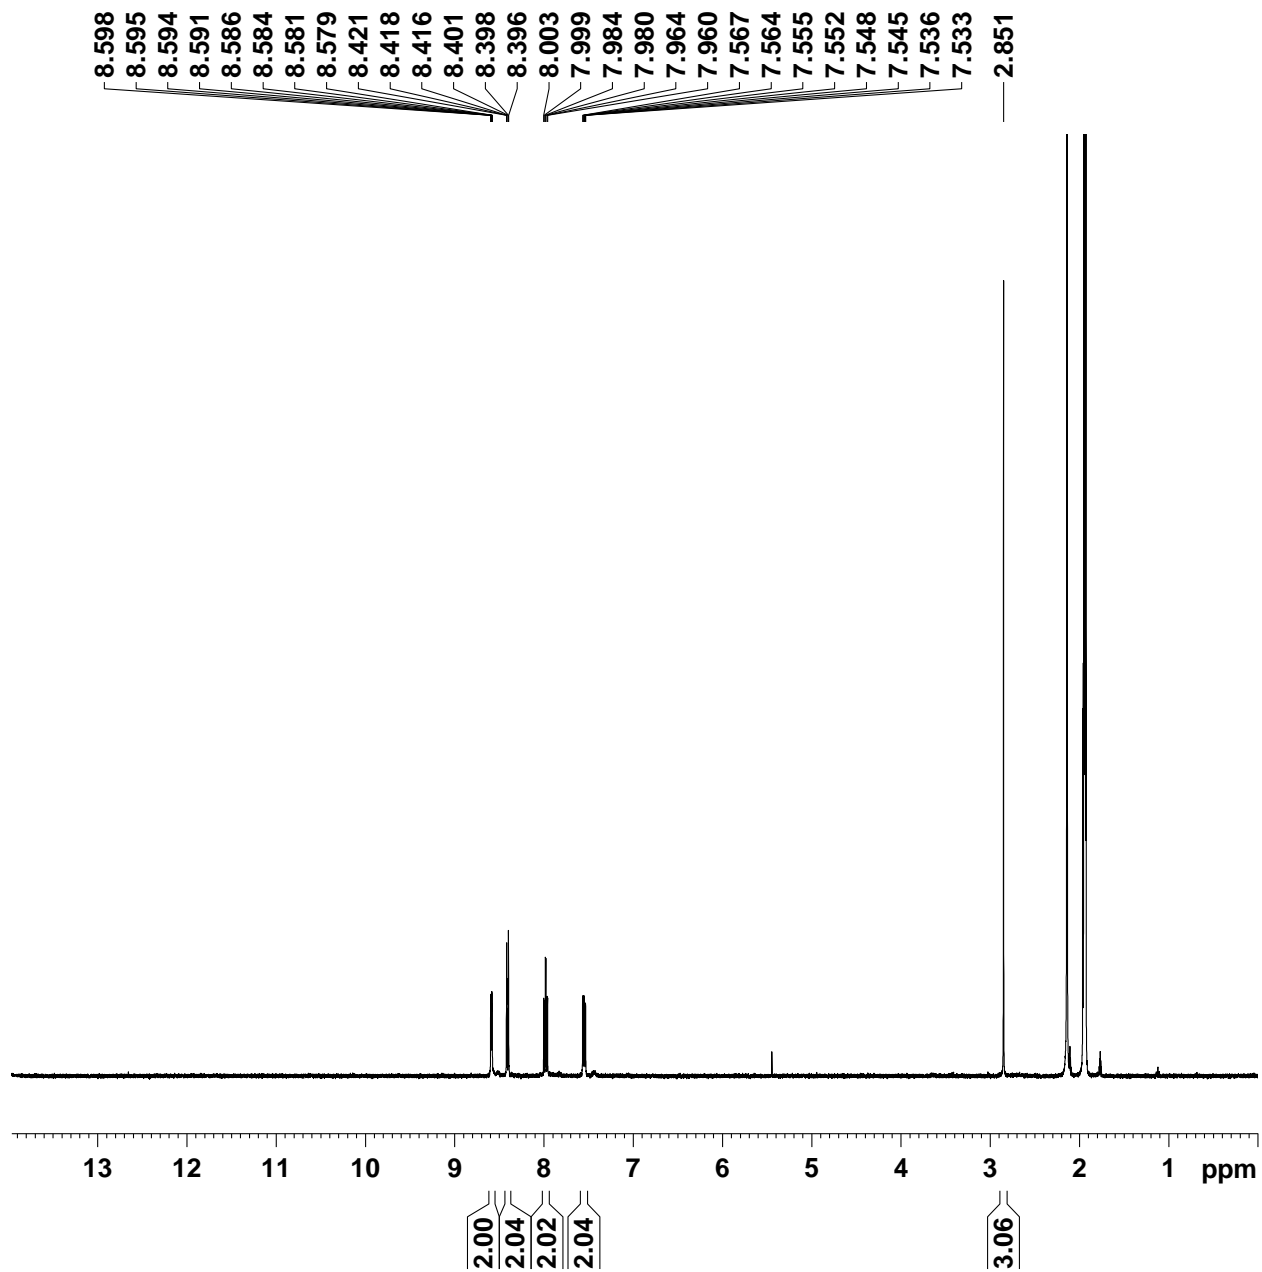

**Figure S7.**  $^1\text{H}$  NMR spectrum of **18** in  $\text{MeCN-d}_3$ .



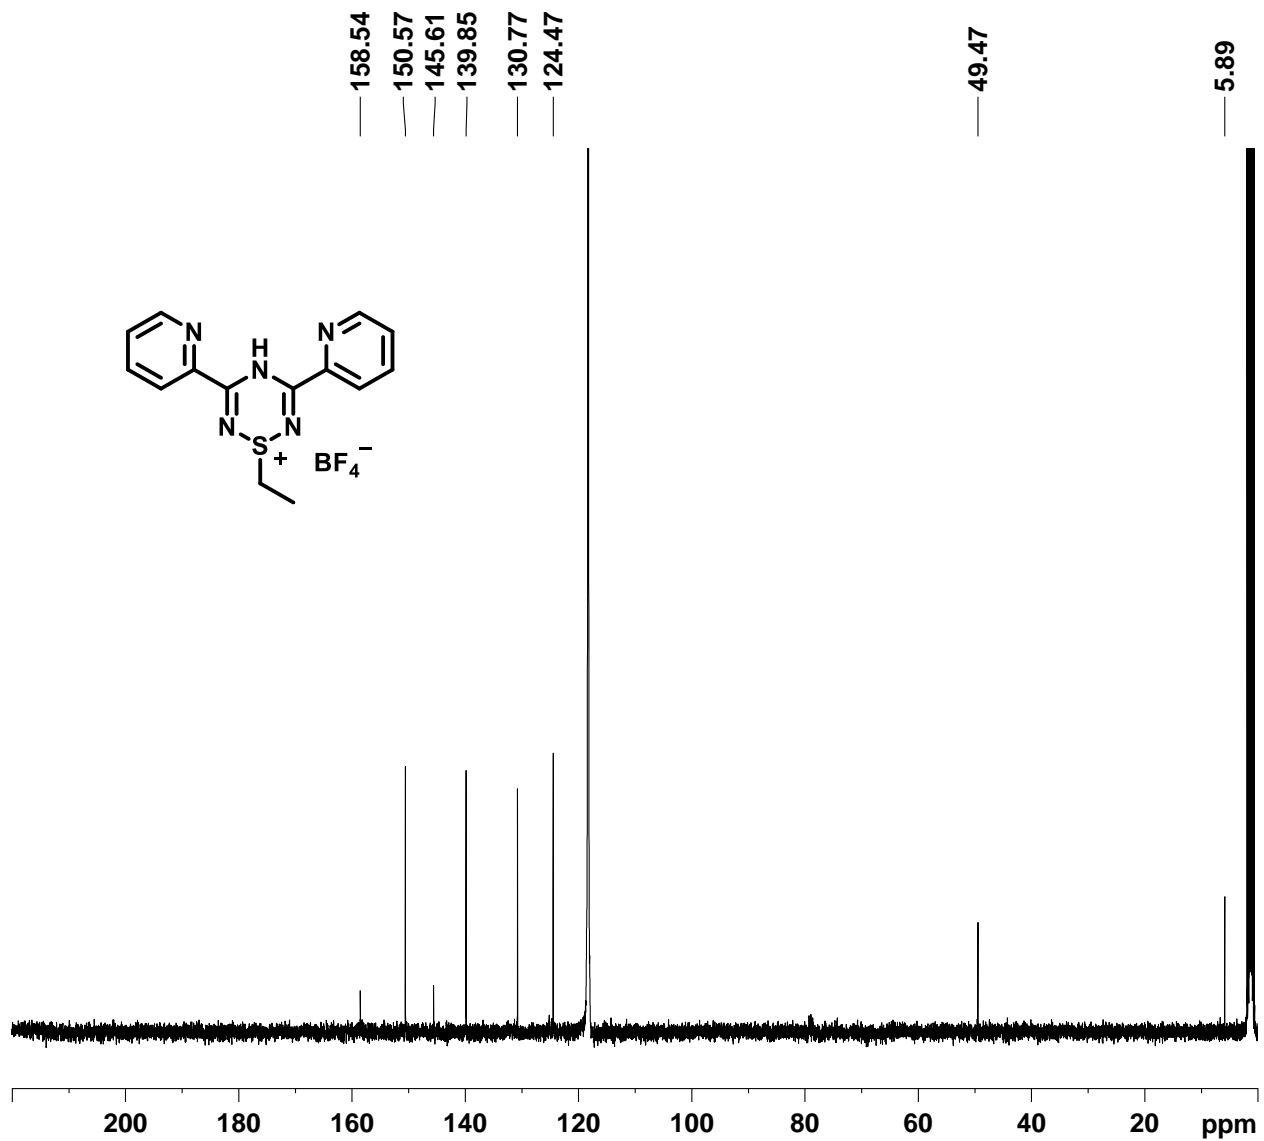

**Figure S8.**  $^{13}\text{C}$  NMR spectrum of **12** in  $\text{MeCN-d}_3$ .

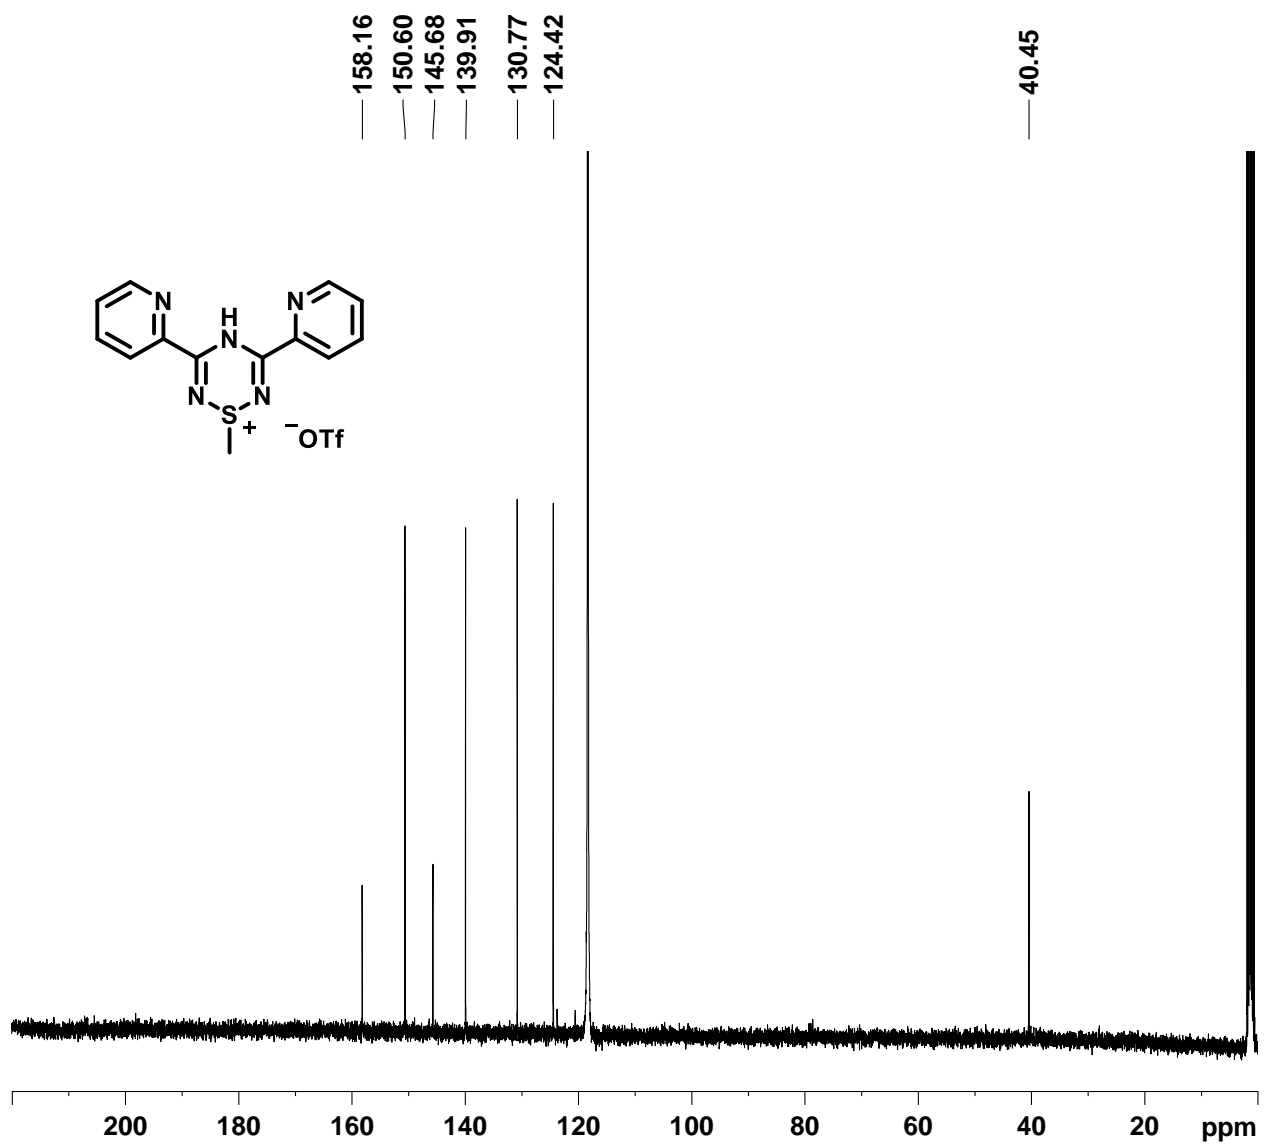

**Figure S9.**  $^{13}\text{C}$  NMR spectrum of **13** in  $\text{MeCN-d}_3$ .

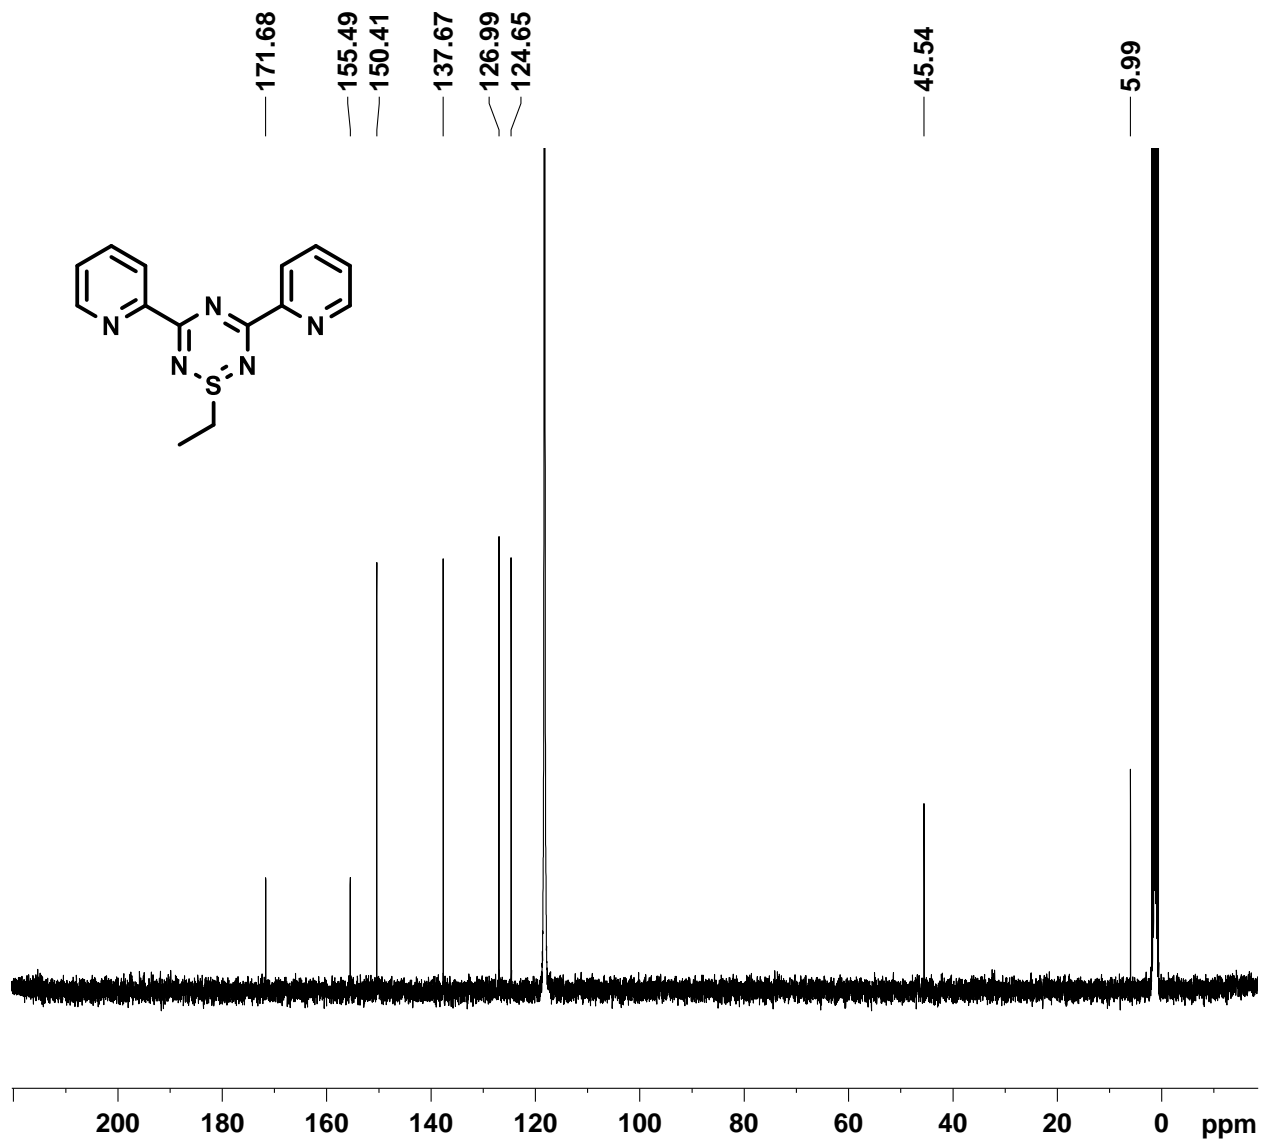

**Figure S10.**  $^{13}\text{C}$  NMR spectrum of **14** in  $\text{MeCN-d}_3$ .

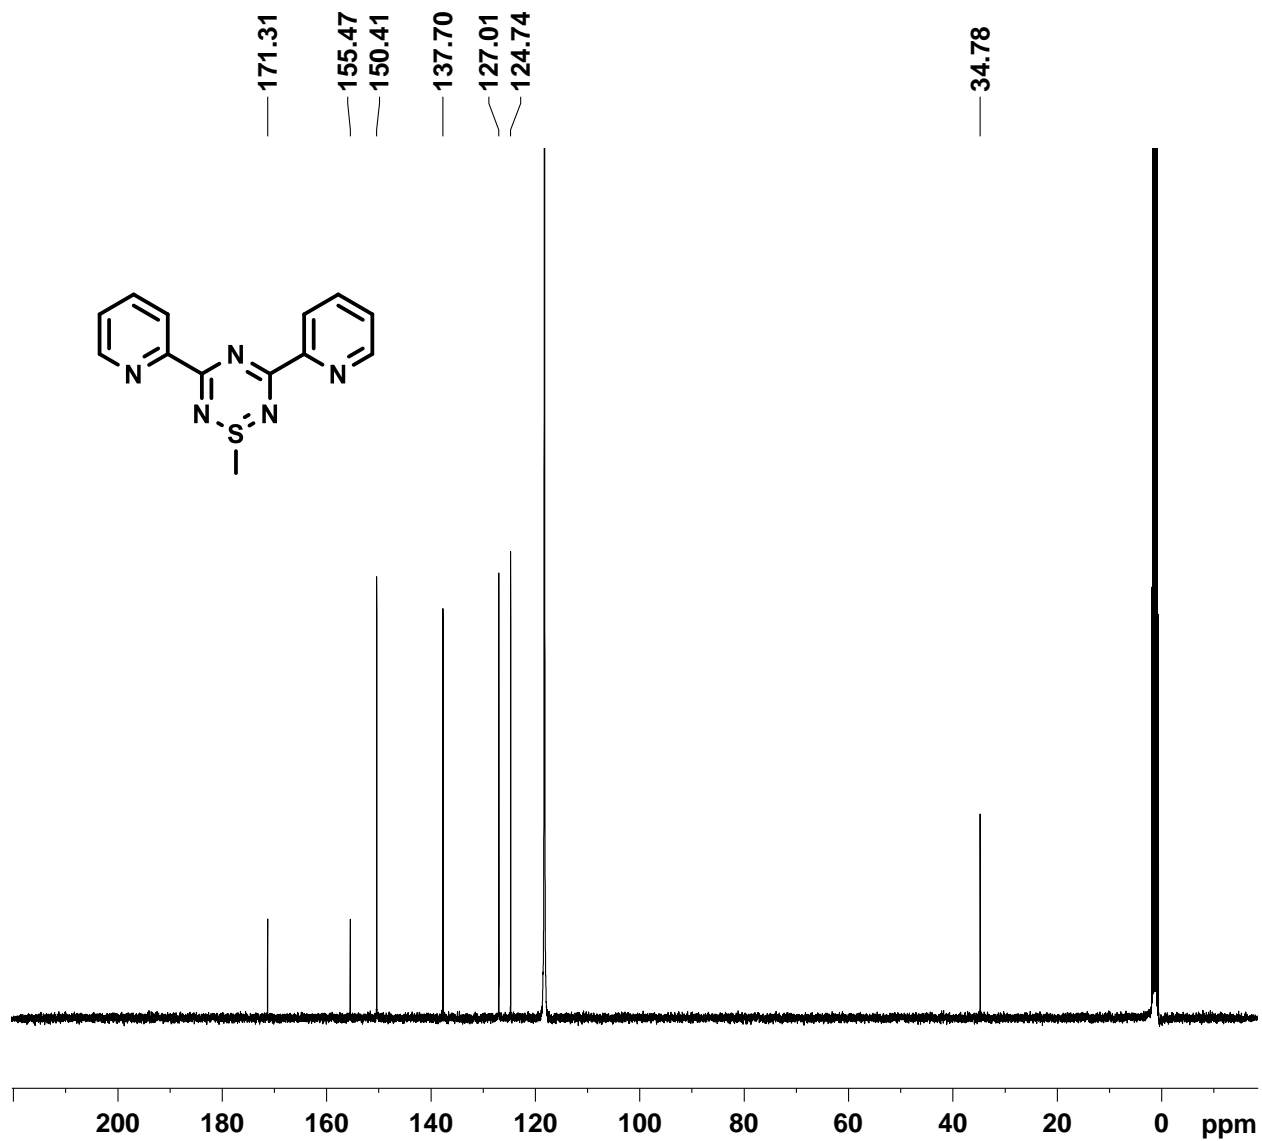

**Figure S11.**  $^{13}\text{C}$  NMR spectrum of **15** in  $\text{MeCN-d}_3$ .

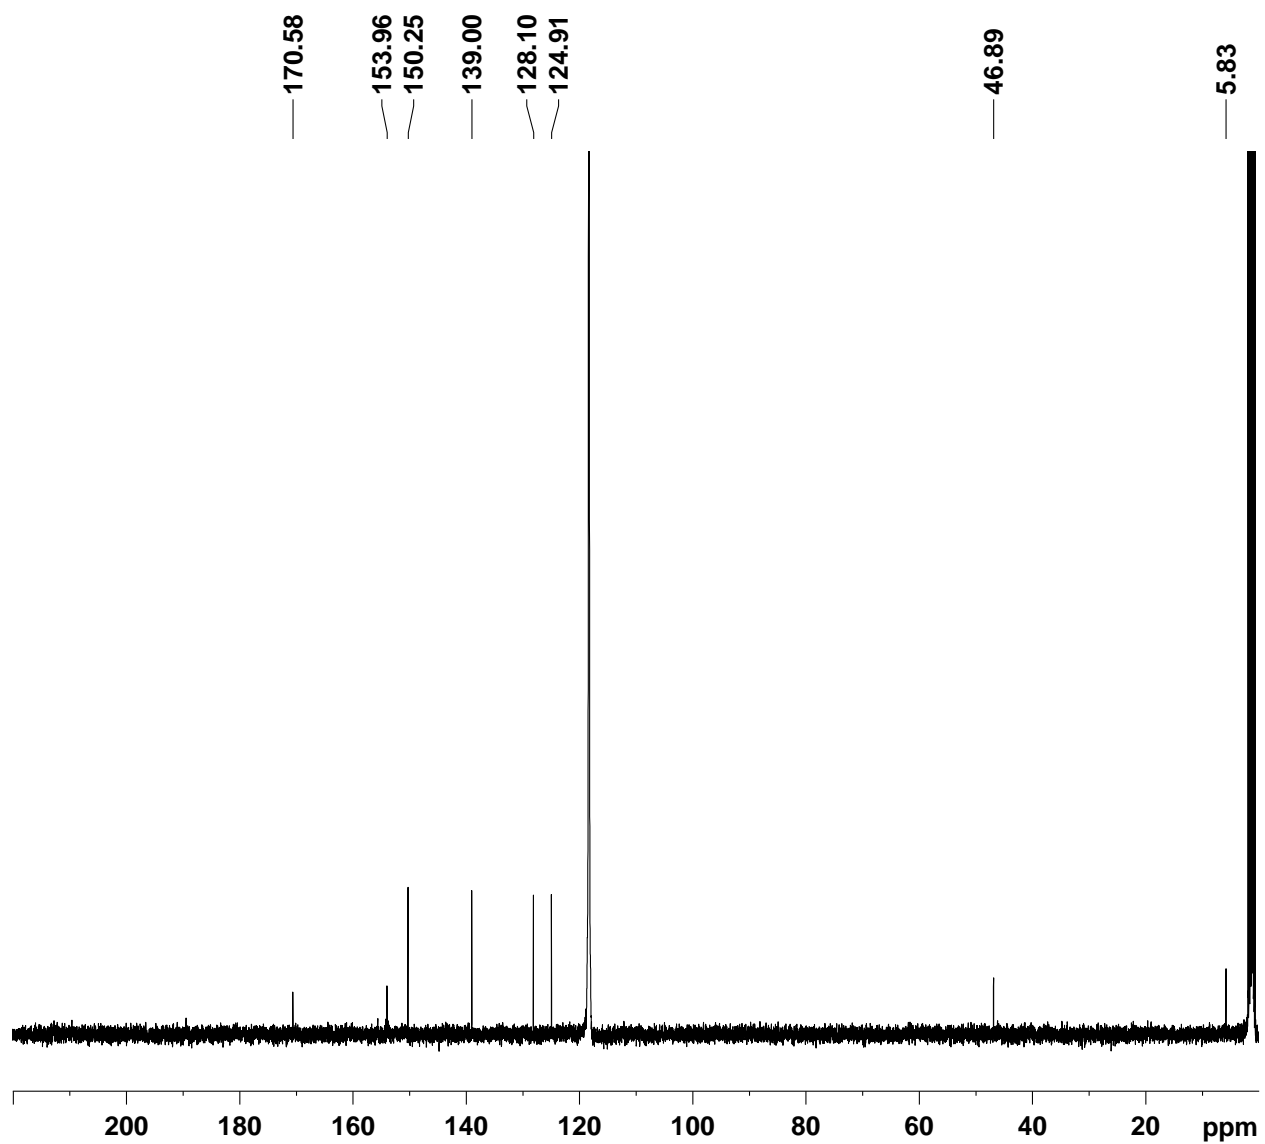

**Figure S12.**  $^{13}\text{C}$  NMR spectrum of **17** in  $\text{MeCN-d}_3$ .

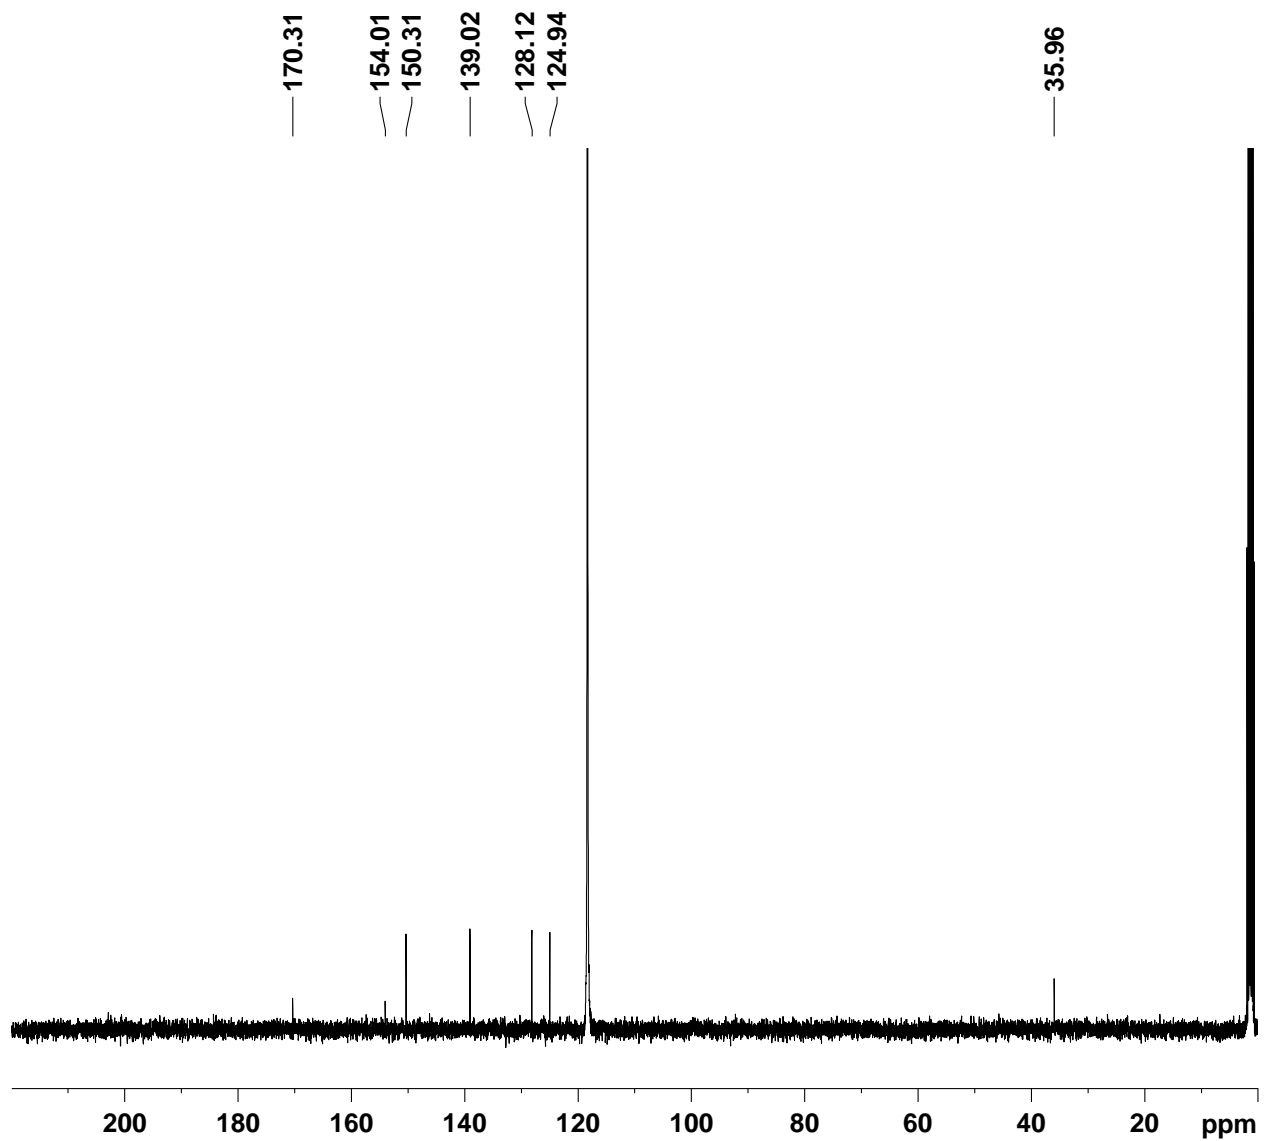

**Figure S13.**  $^{13}\text{C}$  NMR spectrum of **18** in  $\text{MeCN-d}_3$ .

**Table S1.** Crystallographic data and selected collection parameters for **12**, **14**, [**3,5-bis(N-methyl-2-pyridinium)-S-methyl-1,2,4,6-thiatriazine**][OTf]<sub>2</sub> [(MePy)<sub>2</sub>MeTTA][OTf]<sub>2</sub> and **17**.

| Parameters                               | <b>12</b>                                                        | <b>14</b>                                             | [(MePy) <sub>2</sub> MeTTA][OTf] <sub>2</sub>                                               | <b>17</b>                                           |
|------------------------------------------|------------------------------------------------------------------|-------------------------------------------------------|---------------------------------------------------------------------------------------------|-----------------------------------------------------|
| Empirical formula                        | C <sub>14</sub> H <sub>14</sub> BF <sub>4</sub> N <sub>5</sub> S | C <sub>14</sub> H <sub>13</sub> N <sub>5</sub> S      | C <sub>17</sub> H <sub>17</sub> F <sub>6</sub> N <sub>5</sub> O <sub>6</sub> S <sub>3</sub> | C <sub>14</sub> H <sub>13</sub> IN <sub>5</sub> NaS |
| Formula weight                           | 371.17                                                           | 283.35                                                | 597.53                                                                                      | 433.24                                              |
| Crystal system                           | orthorhombic                                                     | orthorhombic                                          | triclinic                                                                                   | triclinic                                           |
| Space group                              | <i>P</i> 2 <sub>1</sub> 2 <sub>1</sub> 2 <sub>1</sub>            | <i>P</i> 2 <sub>1</sub> 2 <sub>1</sub> 2 <sub>1</sub> | <i>P</i> $\bar{1}$                                                                          | <i>P</i> $\bar{1}$                                  |
| a (Å)                                    | 9.9995(2)                                                        | 5.799(3)                                              | 8.938(4)                                                                                    | 10.1629(3)                                          |
| b (Å)                                    | 10.0313(2)                                                       | 14.641(9)                                             | 11.927(5)                                                                                   | 10.3262(3)                                          |
| c (Å)                                    | 16.1233(4)                                                       | 16.056(10)                                            | 12.900(5)                                                                                   | 10.3488(3)                                          |
| α (deg)                                  | 90                                                               | 90                                                    | 96.902(19)                                                                                  | 109.4798(8)                                         |
| β (deg)                                  | 90                                                               | 90                                                    | 108.004(18)                                                                                 | 116.3682(8)                                         |
| γ (deg)                                  | 90                                                               | 90                                                    | 107.987(17)                                                                                 | 102.2525(9)                                         |
| V (Å <sup>3</sup> )                      | 1617.30(6)                                                       | 1363.2(14)                                            | 1208.1(8)                                                                                   | 829.69(4)                                           |
| Z                                        | 4                                                                | 4                                                     | 2                                                                                           | 2                                                   |
| D <sub>calc</sub> (mg/m <sup>3</sup> )   | 1.524                                                            | 1.381                                                 | 1.643                                                                                       | 1.734                                               |
| T (K)                                    | 200(2)                                                           | 258(2)                                                | 200(2)                                                                                      | 200(2)                                              |
| μ (mm <sup>-1</sup> )                    | 0.250                                                            | 0.234                                                 | 0.398                                                                                       | 2.084                                               |
| θ range for data collection (deg)        | 2.397 to 28.28                                                   | 1.882 to 28.089                                       | 2.198 to 34.352                                                                             | 2.313 to 28.43                                      |
| no. of total reflections                 | 14055                                                            | 11126                                                 | 25311                                                                                       | 8711                                                |
| no. of unique reflections                | 3960                                                             | 3294                                                  | 9183                                                                                        | 4062                                                |
| R <sub>int</sub>                         | 0.0279                                                           | 0.0331                                                | 0.0202                                                                                      | 0.0109                                              |
| R1, WR <sub>2</sub> (on F <sub>2</sub> ) | 0.0424, 0.1191                                                   | 0.0419, 0.0933                                        | 0.0485, 0.1266                                                                              | 0.0167, 0.0434                                      |

**Table S2.** Bond length comparisons of the central TTA ring for compounds **12**, **14**, [3,5-*bis*(*N*-methyl-2-pyridinium)-*S*-methyl-1,2,4,6-thiatriazine][OTf]<sub>2</sub> [(MePy)<sub>2</sub>MeTTA][OTf]<sub>2</sub>) and **17**, as well as other previously reported TTA derivatives [3,5-*bis*(*N*-hydro-2-pyridinium)-*S*-bromo-1,2,4,6-thiatriazine][Br][Br<sub>3</sub>] [(HPy)<sub>2</sub>BrTTA][Br][Br<sub>3</sub>)]<sup>1</sup> 3,5-*bis*(pyridyl)-4-hydro-*S*-oxo-1,2,4,6-thiatriazine (Py<sub>2</sub>TTAH=O)<sup>1</sup> and Py<sub>2</sub>TTAH (**11**).<sup>2</sup> Bond numbers are in reference to the numbers shown in the schematic, and all lengths are reported in Angstroms (Å).

| 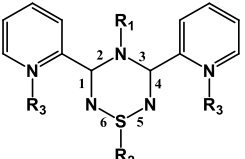 | Aromatic                        |                                                                                                |                                                          |                                                                                                   | Anti-Aromatic                                         |                                |                                                                   |
|----------------------------------------------------------------------------------|---------------------------------|------------------------------------------------------------------------------------------------|----------------------------------------------------------|---------------------------------------------------------------------------------------------------|-------------------------------------------------------|--------------------------------|-------------------------------------------------------------------|
|                                                                                  | <b>14</b><br>R <sub>2</sub> =Et | [(MePy) <sub>2</sub> MeTTA]<br>[OTf] <sub>2</sub><br>R <sub>2</sub> =Me,<br>R <sub>3</sub> =Me | <b>17</b><br>R <sub>1</sub> =Na-I,<br>R <sub>2</sub> =Et | [(HPy) <sub>2</sub> BrTTA]<br>[Br][Br <sub>3</sub> ]<br>R <sub>2</sub> =Br,<br>R <sub>3</sub> =Br | <b>12</b><br>R <sub>1</sub> =H,<br>R <sub>2</sub> =Et | <b>11</b><br>R <sub>1</sub> =H | Py <sub>2</sub> TTAH=O<br>R <sub>1</sub> =H,<br>R <sub>2</sub> =O |
| 1                                                                                | 1.3333(31)                      | 1.3059(20)                                                                                     | 1.3168(26)                                               | 1.3398(47)                                                                                        | 1.2872(37)                                            | 1.279(2)                       | 1.2854(43)                                                        |
| 2                                                                                | 1.3394(32)                      | 1.3571(17)                                                                                     | 1.3409(17)                                               | 1.3378(52)                                                                                        | 1.3556(31)                                            | 1.396(2)                       | 1.3726(42)                                                        |
| 3                                                                                | 1.3504(35)                      | 1.3361(23)                                                                                     | 1.3550(21)                                               | 1.3448(56)                                                                                        | 1.3612(38)                                            | 1.391(2)                       | 1.3671(42)                                                        |
| 4                                                                                | 1.3157(31)                      | 1.3195(22)                                                                                     | 1.3117(26)                                               | 1.3181(48)                                                                                        | 1.2858(37)                                            | 1.278(2)                       | 1.2831(43)                                                        |
| 5                                                                                | 1.6638(23)                      | 1.6731(13)                                                                                     | 1.6693(12)                                               | 1.6216(38)                                                                                        | 1.6630(22)                                            | 1.693(2)                       | 1.6865(27)                                                        |
| 6                                                                                | 1.6544(23)                      | 1.6705(18)                                                                                     | 1.6521(19)                                               | 1.6027(42)                                                                                        | 1.6728(25)                                            | 1.692(2)                       | 1.6814(28)                                                        |



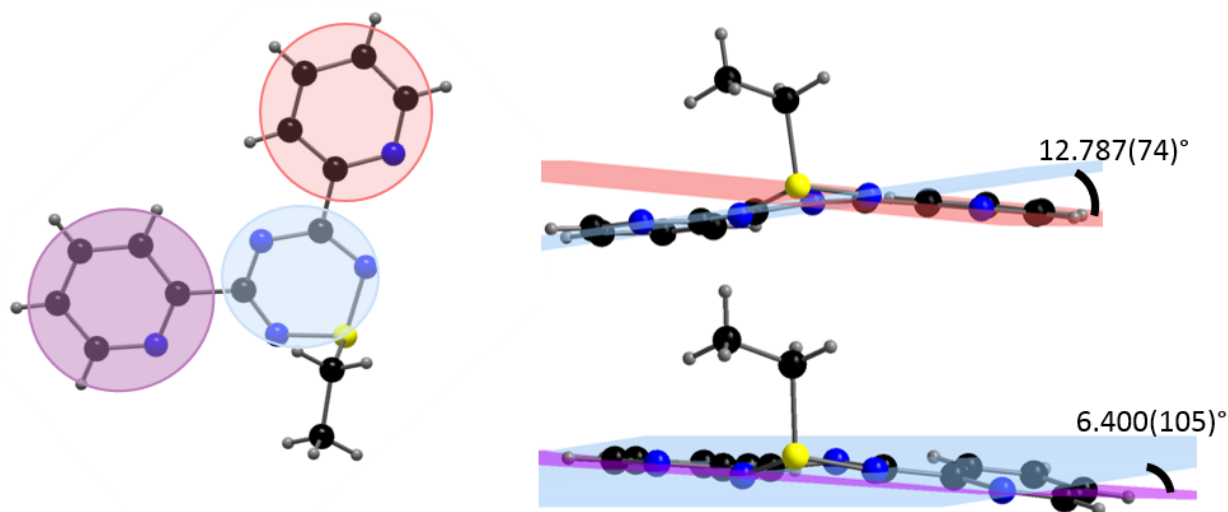

**Figure S14.** Calculated twist angles between planes of the thiaziazine and pyridine rings of **14**. The central plane was calculated without the S and N3 atoms, as this ring adopts a shallow boat-like arrangement.

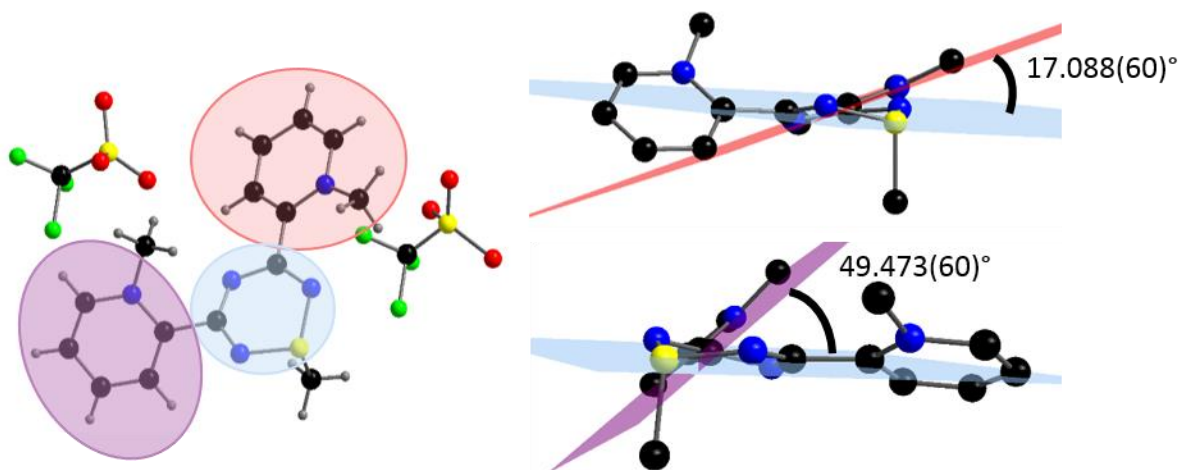

**Figure S15.** Calculated twist angles between planes of the thiaziazine and pyridine rings of [3,5-*bis*(*N*-methyl-2-pyridinium)-*S*-methyl-1,2,4,6-thiaziazine][OTf]<sub>2</sub>. The central plane was calculated without the S11 and N22 atoms, as this ring adopts a shallow boat-like arrangement. Hydrogens removed for clarity (left).

**Table S3:** Frontier molecular orbitals and corresponding energies (in eV) for **14**, **15**, and **11**. Energies were calculated at the B3LYP/6-311+G(2d,p) level of theory, and orbital probability diagrams were generated using GaussView 5.0 software.<sup>3</sup>

|        | 14                                                                                              | 15                                                                                               | 11                                                                                                |
|--------|-------------------------------------------------------------------------------------------------|--------------------------------------------------------------------------------------------------|---------------------------------------------------------------------------------------------------|
| LUMO+2 | 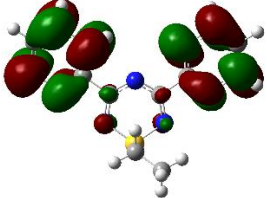<br>-0.977226  | <br>-1.12846   | <br>-1.24710   |
| LUMO+1 | <br>-1.28628   | <br>-1.49472   | <br>-1.57227   |
| LUMO   | <br>-2.27324  | <br>-2.53801  | <br>-2.26861  |
| HOMO   | <br>-6.22216 | <br>-6.60013 | <br>-5.28364 |
| HOMO-1 | <br>-7.01592 | <br>-7.30626 | <br>-7.40014 |
| HOMO-2 | <br>-7.09891 | <br>-7.38463 | <br>-7.54545 |

**Table S4** – TD DFT optical transitions<sup>a</sup> for **14** and **15**, calculated at the B3LYP/6-311+G(2d,p) level of theory on geometry optimized structures with Gaussian 09 software.<sup>3</sup>

| <i>k</i> | <b>14</b> |          | <b>15</b> |          |
|----------|-----------|----------|-----------|----------|
|          | E (eV)    | <i>f</i> | E (eV)    | <i>f</i> |
| 1        | 3.1469    | 0.0276   | 3.2206    | 0.0273   |
| 2        | 3.8194    | 0.0250   | 3.7961    | 0.0408   |
| 3        | 3.9578    | 0.0071   | 3.9157    | 0.0046   |
| 4        | 4.2397    | 0.0429   | 4.2561    | 0.1391   |
| 5        | 4.2852    | 0.0829   | 4.2670    | 0.0293   |
| 6        | 4.3775    | 0.2499   | 4.4441    | 0.0153   |
| 7        | 4.3898    | 0.0703   | 4.4444    | 0.2303   |
| 8        | 4.5744    | 0.1362   | 4.5399    | 0.1592   |
| 9        | 4.7329    | 0.0581   | 4.8148    | 0.0405   |
| 10       | 4.7701    | 0.0093   | 4.8729    | 0.0097   |
| 11       | 5.0354    | 0.0025   | 5.0133    | 0.0012   |
| 12       | 5.0839    | 0.0041   | 5.0669    | 0.0013   |
| 13       | 5.0906    | 0.0043   | 5.0793    | 0.0003   |
| 14       | 5.1081    | 0.0093   | 5.0827    | 0.084    |
| 15       | 5.1274    | 0.0200   | 5.0834    | 0.0002   |
| 16       | 5.1886    | 0.0501   | 5.1349    | 0.0686   |
| 17       | 5.3649    | 0.1191   | 5.3638    | 0.1637   |
| 18       | 5.3779    | 0.1082   | 5.4066    | 0.0727   |
| 19       | 5.4587    | 0.0232   | 5.5428    | 0.0277   |
| 20       | 5.5231    | 0.0153   | 5.5823    | 0.0111   |

<sup>a</sup> *k* = order of excitation energy and *f* = oscillator strength.

**Table S5** – Selected TD DFT transitions for **14**. Transitions shown are those with the greatest calculated oscillator strength, as well as the HOMO to LUMO transition. Calculations were performed at the B3LYP/6-311+G(2d,p) level of theory with acetonitrile solvation using Gaussian 09 software.<sup>3</sup>

| Calculated $\lambda$ (nm) | Transitions     | Oscillator Strength ( <i>f</i> ) |
|---------------------------|-----------------|----------------------------------|
| 394                       | HOMO → LUMO     | 0.0276                           |
| 283                       | HOMO-6 → LUMO   | 0.2499                           |
|                           | HOMO-5 → LUMO   |                                  |
|                           | HOMO-4 → LUMO   |                                  |
|                           | HOMO-3 → LUMO   |                                  |
|                           | HOMO-2 → LUMO   |                                  |
|                           | HOMO-1 → LUMO   |                                  |
|                           | HOMO → LUMO+1   |                                  |
| 271                       | HOMO-6 → LUMO   | 0.1362                           |
|                           | HOMO-5 → LUMO   |                                  |
|                           | HOMO-4 → LUMO   |                                  |
|                           | HOMO-3 → LUMO   |                                  |
|                           | HOMO-2 → LUMO   |                                  |
|                           | HOMO-1 → LUMO   |                                  |
|                           | HOMO → LUMO+2   |                                  |
| 231                       | HOMO-8 → LUMO   | 0.1191                           |
|                           | HOMO-5 → LUMO+1 |                                  |
|                           | HOMO-4 → LUMO+1 |                                  |
|                           | HOMO-2 → LUMO+1 |                                  |
|                           | HOMO → LUMO+4   |                                  |
| 230                       | HOMO-8 → LUMO   | 0.1082                           |
|                           | HOMO-5 → LUMO+1 |                                  |
|                           | HOMO-4 → LUMO+1 |                                  |
|                           | HOMO-2 → LUMO+1 |                                  |
|                           | HOMO → LUMO+4   |                                  |

**Table S6** – Selected TD DFT transitions for **15**. Transitions shown are those with the greatest calculated oscillator strength, as well as the HOMO to LUMO transition. Calculations were performed at the B3LYP/6-311+G(2d,p) level of theory with acetonitrile solvation using Gaussian 09 software.<sup>3</sup>

| Calculated $\lambda$ (nm) | Transitions                                                                                                            | Oscillator Strength ( <i>f</i> ) |
|---------------------------|------------------------------------------------------------------------------------------------------------------------|----------------------------------|
| 385                       | HOMO $\rightarrow$ LUMO                                                                                                | 0.0273                           |
| 291                       | HOMO-6 $\rightarrow$ LUMO<br>HOMO-4 $\rightarrow$ LUMO+1<br>HOMO-3 $\rightarrow$ LUMO<br>HOMO-2 $\rightarrow$ LUMO+1   | 0.1391                           |
| 279                       | HOMO-5 $\rightarrow$ LUMO<br>HOMO-3 $\rightarrow$ LUMO<br>HOMO-1 $\rightarrow$ LUMO                                    | 0.2303                           |
| 273                       | HOMO-5 $\rightarrow$ LUMO<br>HOMO-4 $\rightarrow$ LUMO<br>HOMO-2 $\rightarrow$ LUMO<br>HOMO $\rightarrow$ LUMO+2       | 0.1592                           |
| 231                       | HOMO-8 $\rightarrow$ LUMO<br>HOMO-5 $\rightarrow$ LUMO+1<br>HOMO-4 $\rightarrow$ LUMO+1<br>HOMO-2 $\rightarrow$ LUMO+1 | 0.1637                           |

**Table S7** – Comparative table for the measured molar coefficients of extinction<sup>a</sup> with the corresponding calculated oscillator strengths<sup>b</sup> for **14** and **15**.

|           | $\lambda$ (nm) | $\epsilon$ ( $\mu\text{M}^{-1}\text{cm}^{-1}$ ) | Calculated $\lambda$<br>(nm) | $f$    |
|-----------|----------------|-------------------------------------------------|------------------------------|--------|
| <b>14</b> | 240            | 0.0161                                          | 230                          | 0.1082 |
|           |                |                                                 | 231                          | 0.1191 |
|           | 275            | 0.0196                                          | 271                          | 0.1362 |
|           |                |                                                 | 283                          | 0.2499 |
|           | 390            | 0.0018                                          | 394                          | 0.0276 |
|           | <b>15</b>      | 240                                             | 0.0164                       | 231    |
| 273       |                |                                                 |                              | 0.1592 |
| 275       |                | 0.0195                                          | 279                          | 0.2303 |
|           |                |                                                 | 291                          | 0.1391 |
| 390       |                | 0.0019                                          | 385                          | 0.0273 |

<sup>a</sup> Optical measurements were performed on dilute MeCN solutions. <sup>b</sup> TD DFT/B3LYP/6-311+G(2d,p) level of theory on geometry optimized structures where  $f$  = oscillator strength using Gaussian 09 software.<sup>3</sup>

## References

1. A. A. Leitch, I. Korobkov, A. Assoud and J. L. Brusso, *Chemical Communications*, 2014, **50**, 4934-4936.
2. N. J. Yutronkie, A. A. Leitch, I. Korobkov and J. L. Brusso, *Crystal Growth & Design*, 2015, **15**, 2524-2532.
3. M. J. Frisch, G. W. Trucks, H. B. Schlegel, G. E. Scuseria, M. A. Robb, J. R. Cheeseman, G. Scalmani, V. Barone, B. Mennucci, G. A. Petersson, H. Nakatsuji, M. Caricato, X. Li, H. P. Hratchian, A. F. Izmaylov, J. Bloino, G. Zheng, J. L. Sonnenberg, M. Hada, M. Ehara, K. Toyota, R. Fukuda, J. Hasegawa, M. Ishida, T. Nakajima, Y. Honda, O. Kitao, H. Nakai, T. Vreven, J. J. A. Montgomery, J. E. Peralta, F. Ogliaro, M. Bearpark, J. J. Heyd, E. Brothers, K. N. Kudin, V. N. Staroverov, R. Kobayashi, J. Normand, K. Raghavachari, A. Rendell, J. C. Burant, S. S. Iyengar, J. Tomasi, M. Cossi, N. Rega, J. M. Millam, M. Klene, J. E. Knox, J. B. Cross, V. Bakken, C. Adamo, J. Jaramillo, R. Gomperts, R. E. Stratmann, O. Yazyev, A. J. Austin, R. Cammi, C. Pomelli, J. W. Ochterski, R. L. Martin, K. Morokuma, V. G. Zakrzewski, G. A. Voth, P. Salvador, J. J. Dannenberg, S. Dapprich, A. D. Daniels, O. Farkas, J. B. Foresman, J. V. Ortiz, J. Cioslowski and D. J. Fox, *Gaussian 09*, Revision A.02; Gaussian, Inc.: Wallingford, CT, 2009.
